# Supplementary material
Source: PubMed Central journal article supplement (PMC4323878)
Supplement: NIHMS650538-supplement-1.pdf [file NIHMS650538-supplement-1.pdf]

**Table S1.** Reverse transcriptase-polymerase chain reaction (RT-PCR) mouse primers

| Target         |         | Sense/anti-sense (5-3 )   | Size (bp) |
|----------------|---------|---------------------------|-----------|
| defB2-         | Forward | AAGTATTGGATACGAAGCAG      | 83        |
|                | Reverse | TGGCAGAAGGAGGACAAATG      |           |
| defB3-         | Forward | GCATTGGCAACACTCGTCAGA     | 85        |
|                | Reverse | CGGGATCTTGGTCTTCTCTATT    |           |
| defB4-         | Forward | GCAGCCTTTACCCAAATTATC     | 102       |
|                | Reverse | ACAATTGCCAATCTGTGCGAA     |           |
| defB14-        | Forward | GGACGCATTCTACCAAAAA       | 89        |
|                | Reverse | TCTTCCTTTCCAAGGCAGTT      |           |
| Camp-          | Forward | GTGGGGAGAAGATTGGTGAA      | 116       |
|                | Reverse | GAATCCAGAAACAGCCCAAG      |           |
| GAPDH-         | Forward | CGTCCCGTAGACAAAATGGT      | 177       |
|                | Reverse | GAATTTGCCGTGAGTGGAGT      |           |
| IL-1 $\beta$ - | Forward | CAACCAACAAGTGATATTCTCCATG | 152       |
|                | Reverse | GATCCACACTCTCCAGCTGCA     |           |
| IL-17a-        | Forward | AGCTCGACCACCACATGAAT      | 104       |
|                | Reverse | AGCATCTTCTCGACCCTGAA      |           |
| IL-17f-        | Forward | CAAAACCAGGGCATTCTGT       | 81        |
|                | Reverse | GGGGTCTCGAGTGATGTTGT      |           |
| Cxcl1-         | Forward | AACGGAGAAAGAAGACAGACTG    | 102       |
|                | Reverse | GACGAGACCAGGAGAAACAG      |           |
| IL-18-         | Forward | ACAAC TTTGGCCGACTTCAC     | 128       |
|                | Reverse | GGGTTCACTGGCACTTTGAT      |           |
| IL-6-          | Forward | CCGGAGAGGAGACTTCACAG      | 166       |
|                | Reverse | TTCTGCAAGTGCATCATCGT      |           |
| Nlrc4-         | Forward | CTGGAAAAGGATGGGAATGA      | 89        |
|                | Reverse | CCAAGGCAGCATCAATGTAG      |           |
| Nlrp3-         | Forward | TCCACAATTCTGACCCACAA      | 92        |
|                | Reverse | ACCTCACAGAGGGTCACCAC      |           |

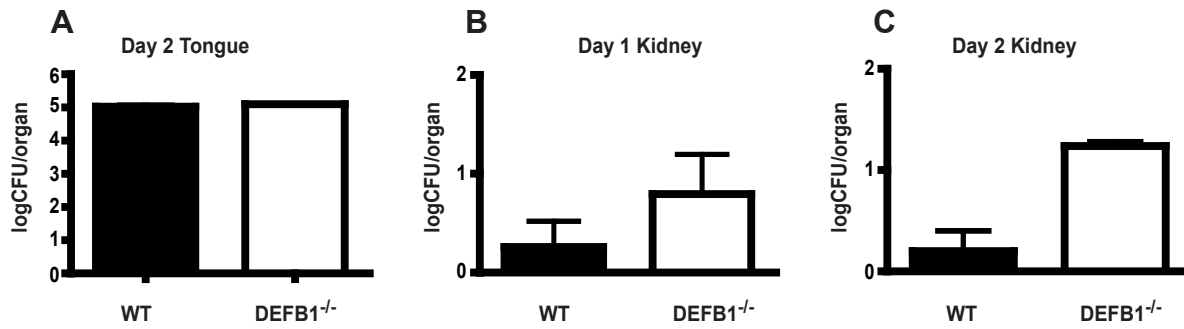

**Supplemental Figure S1. Early dissemination of *Candida* observed in absence of mBD1.**

(A) Tongue CFU was determined in WT and *DefB1*<sup>-/-</sup> mice 2 days post oral infection with *Candida albicans*. Fungal burdens were measured in the kidneys of mice (B) 1 day and (C) 2 days of infection.

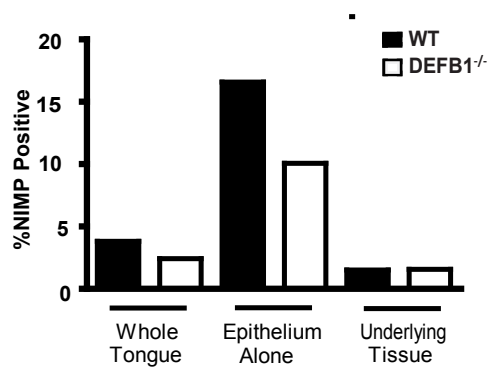

**Supplemental Figure S2. Decreased neutrophil infiltration into the epithelium of mBD1 deficient hosts.**

Neutrophil infiltration into the tongue was quantified using the MetaMorph Software. Shown are percent ratios of NIMP-positive pixels over total pixels for the whole tongue, epithelium alone, and submucosa alone.

Graph represents images presented in Figure 2.

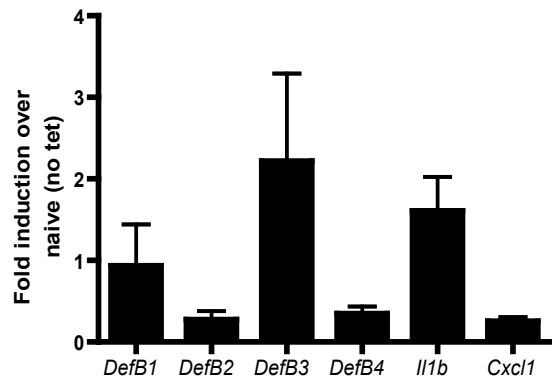

**Supplemental Figure S3. Tetracycline treatment has minimal impact on innate gene expression.**

mRNA was extracted from intestinal mucosal tissue from either untreated or tetracycline treated mice 3 days post scoring and mock infection with sterile PBS. Values are expressed as fold induction over naïve (non-tet).
